# Supplementary material
Source: PubMed Central journal article supplement (PMC4809642)

## **Supplementary Information**

### **Methods**

#### *Study Design*

The trial implemented standard inclusion/exclusion criteria including age  $\geq 18$ , Eastern Cooperative Oncology Group (ECOG) performance status (PS) of 0 to 2, bilirubin  $< 2$ , aspartate aminotransferase/alanine aminotransferase (AST/ALT)  $< 2.5$  upper limits of normal (ULN), normal serum creatinine or creatine clearance  $> 50$ . Patients were not excluded due to previous treatments, prior stem cell transplantation or other malignancy, if in remission.

#### *Safety*

DLTs were defined for both Strata as: 1) any non-hematologic toxicity  $\geq$  Grade 3 attributable to RG7112, except for fatigue, anorexia and alopecia; 2) nausea/vomiting and/or diarrhea would be considered DLT only if they reached  $\geq$  Grade 3 severity despite adequate supportive care measures and 3) Grade 3 AST or ALT toxicity lasting for  $> 7$  days or Grade 4 lasting for any duration of time.

For Stratum A patients, myelosuppression and associated complications are expected during leukemia therapy and were judged to be part of the disease process. Therefore, these complications were not considered dose limiting for Stratum A patients. However, prolonged myelosuppression was considered as a DLT. After a patient was removed from study due to a DLT of uncomplicated hyperuricemia from tumor lysis, the protocol was subsequently amended to exclude isolated laboratory abnormalities associated with tumor lysis as part of the definition of DLT.

For Stratum B patients, the following AEs were considered a DLT: (1) Grade 4 neutropenia lasting at least 7 days; (2) febrile neutropenia: absolute neutrophil count (ANC)  $< 1.0 \times 10^9/L$  and temperature  $\geq 38.5^\circ C$ ; (3) thrombocytopenia with platelet count  $\leq 10 \times 10^9/L$  or any thrombocytopenia requiring platelet transfusion and (4) delay of Cycle 2 - Day 1 treatment for  $>$

14 days due to drug-related toxicity. The DLT criteria for myelosuppression only applied if patient baseline ANC and platelet counts were  $\geq 1.5 \times 10^9/L$  and  $\geq 100 \times 10^9/L$ , respectively. If the baseline ANC and/or platelet count were low as a result of the involvement of the bone marrow by the disease, then the blood count and DLT criteria as defined for Stratum A were applied.

| <b>Supplementary Data 1. Study design</b>                                                                                               |                                          |
|-----------------------------------------------------------------------------------------------------------------------------------------|------------------------------------------|
| <b>Stratum A</b>                                                                                                                        | <b>Stratum B</b>                         |
| Acute leukemias, including AML (not APL), ALL, CML-BC<br>Inclusion of a “tail” to test efficacy at the MTD                              | Chronic leukemia, including CLL and sCLL |
| PO QD dosing x 10 days followed by 18 days off (28-day cycle)<br>Dose escalations, DLT and MTD conducted independently for each stratum |                                          |
| Dosing changed to BID; at MTD, dose changed to BID flat dose for convenience                                                            |                                          |

AML, acute myelotic leukemia; APL, acute promyelocytic leukemia; CML-BC, chronic myelogenous leukemia – blast crisis; MTD, maximum tolerated dose; CLL, chronic lymphocytic leukemia; sCLL, small cell lymphocytic leukemia; QD, once-daily; DLT, dose-limiting toxicity; BID, twice-daily

| <b>Supplementary Data 2. p53 target genes</b> |                                          |                                                                                                      |
|-----------------------------------------------|------------------------------------------|------------------------------------------------------------------------------------------------------|
| <b>Gene symbol</b>                            | <b>Gene name</b>                         | <b>Description</b>                                                                                   |
| APAF1                                         | Apoptotic peptide activating factor      | Cytoplasmic protein that initiates apoptosis                                                         |
| BAX                                           | Bcl2-associated X protein                | Regulated by p53; involved in p53-mediated apoptosis                                                 |
| BBC3/PUMA                                     | Bcl2 binding component 3                 | Belongs to BH3-only pro-apoptotic subclass and induces mitochondrial outer membrane permeabilization |
| BTG2                                          | BTG family member 2                      | Has anti-proliferative properties and regulates the G1/S transition                                  |
| CDKN1A                                        | Cyclin-dependent kinase inhibitor 1A     | Controlled by p53 and mediates p53-dependent G1 arrest                                               |
| CXCL12                                        | Chemokine (C-X-C motif) ligand 12        | Plays a role in tumor growth                                                                         |
| CXCR4                                         | Chemokine (C-X-C motif) receptor 4       | Overexpressed in tumors                                                                              |
| E2F1                                          | E2F transcription factor 1               | Mediates cell proliferation and p53-dependent/independent apoptosis                                  |
| FAS                                           | FAS cell surface death receptor          | Forms a death-inducing signaling complex                                                             |
| FDXR                                          | Ferredoxin reductase                     | Mitochondrial flavoprotein that affects p53-dependent apoptosis                                      |
| GAPDH                                         | Glyceraldehyde-3-phosphate dehydrogenase | Used as a housekeeping gene                                                                          |
| GDF15/MIC-1                                   | Growth differentiation factor 15         | Affects p53 activation and regulates tissue differentiation/maintenance                              |
| IL8/CXCL8                                     | Chemokine (C-X-C motif) ligand 8         | Chemoattractant with angiogenic functions                                                            |

|               |                                                        |                                                                                      |
|---------------|--------------------------------------------------------|--------------------------------------------------------------------------------------|
| MDM2          | Human homolog of double minute 2                       | E3 ubiquitin protein ligase that binds p53                                           |
| PERP          | p53 induced protein PIGFC1                             | p53 apoptosis effector                                                               |
| PMAIP1/NOXA   | PMA induced product 1                                  | Directs the hypoxia response                                                         |
| PTEN          | Phosphatase and tensin homolog                         | Functions as tumor suppressor by negatively regulating the AKT/PKB signaling pathway |
| TNFRSF10B/DR5 | tumor necrosis factor receptor superfamily, member 10b | Receptor for the cytotoxic ligand TNFSF10/TRAIL                                      |
| TP53          | Tumor protein 53                                       | Tumor suppressor protein                                                             |
| TP53I3        | Tumor protein p53 inducible protein 3                  | Induced by p53 and involved in p53-mediated apoptosis                                |
| TP53INP1      | Tumor protein p53 inducible nuclear protein 1          | Damage-dependent induction and induced by p53                                        |
| XPO1          | Exportin 1                                             | Mediates leucin-rich nuclear export signal (NES)-dependent protein transport         |
| ZMAT3         | p53 target zinc finger protein                         | Upregulated by p53 and inhibits tumor cell growth                                    |
| 18S           | 18S ribosomal RNA                                      | Used as a housekeeping gene                                                          |

| <b>Supplementary Data 3. Evaluable patients treated at the MTD</b> |                  |                                                                         |                               |                 |                                    |
|--------------------------------------------------------------------|------------------|-------------------------------------------------------------------------|-------------------------------|-----------------|------------------------------------|
| <b>Disease</b>                                                     | <b>Age / Sex</b> | <b>Status at entry / # prior</b>                                        | <b>p53 Status at baseline</b> | <b>Response</b> | <b>AUC<sub>ss</sub> (hr*ng)/mL</b> |
| AML                                                                | 48 M             | Primary refractory                                                      | WT                            | CR              | 214,092                            |
| AML                                                                | 70 M             | Primary refractory                                                      | WT                            | CR              | 221,341                            |
| AML                                                                | 25 F             | 3 <sup>rd</sup> relapse, preceding response ≥ 6 mo., Hx aplastic anemia | WT                            | CRp             | 123,900                            |
| AML                                                                | 58 F             | Refractory to 1 <sup>st</sup> induction                                 | WT                            | PR              | 240,810                            |
| AML                                                                | 69 M             | 1 <sup>st</sup> relapse, initial response < 6 mo., prior DLBCL          | WT                            | PR              | 206,109                            |
| AML                                                                | 69 F             | Primary refractory, 2 prior regimens                                    | WT                            | SD              | 220,040                            |
| AML                                                                | 60 F             | 2 <sup>nd</sup> relapse, preceding response ≥ 6 mo., Hx breast CA       | WT                            | SD              | 107,782                            |
| AML                                                                | 63 M             | Refractory (2 prior regimens)                                           | WT                            | SD              | 226,848                            |
| AML                                                                | 62 F             | Refractory (2 prior regimens)                                           | Mutant                        | SD              | 314,430                            |
| AML                                                                | 65 F             | 2 <sup>nd</sup> relapse, preceding response ≥ 6 mo., prior breast CA    | WT                            | SD              | 236,704                            |
| AML                                                                | 36 M             | Refractory NOS, prior MDS                                               | WT                            | SD              | 365,078                            |
| AML                                                                | 77 F             | 1 <sup>st</sup> relapse, initial CR < 6 mo., antecedent MDS             | WT                            | SD              | 178,671                            |
| AML                                                                | 58 M             | 2 <sup>nd</sup> relapse, preceding response < 6 mo.                     | WT                            | SD              | 175,170                            |

|     |      |                                                                 |         |    |         |
|-----|------|-----------------------------------------------------------------|---------|----|---------|
| AML | 73 M | 1 <sup>st</sup> relapse, initial response $\geq$ 6 mo.          | Mutant  | SD | 307,322 |
| ALL | 22 F | 1 <sup>st</sup> relapse, initial response $\geq$ 6 mo.          | WT      | SD | NA      |
| ALL | 43 F | 1 <sup>st</sup> relapse, initial CR < 6 mo.                     | WT      | SD | 130303  |
| AML | 56 M | Relapse < 6 mo. after MUD BMT, prior rectal CA                  | WT      | PD | 78,555  |
| AML | 26 M | 2 <sup>nd</sup> relapse, preceding response $\geq$ 6 mo.        | WT      | PD | 58,796  |
| AML | 19 M | 3 <sup>rd</sup> relapse, preceding response $\leq$ 6 mo.        | Unknown | PD | 150,090 |
| AML | 60 M | 3 <sup>rd</sup> relapse, preceding response $\geq$ 6 mo.        | Mutant  | PD | 196,265 |
| AML | 33 F | FLT3 mutant, refractory relapse after BMT                       | WT      | PD | 117,150 |
| AML | 73 M | 3 <sup>rd</sup> relapse, duration of preceding response unknown | Mutant  | PD | NA      |
| ALL | 58 M | 3 <sup>rd</sup> relapse, preceding response $\geq$ 6 mo.        | WT      | PD | 39,918  |
| AML | 31 F | 2 <sup>nd</sup> relapse, initial CR < 6 mo.                     | WT      | PD | 153,600 |
| AML | 61 M | Relapse > 3 prior regimens, initial CR < 6 mo.                  | WT      | PD | NA      |

|     |      |                                                                                    |        |    |         |
|-----|------|------------------------------------------------------------------------------------|--------|----|---------|
| AML | 27 M | Biophenotypic, refractory 3 <sup>rd</sup> relapse, preceding response $\geq$ 6 mo. | Mutant | PD | 88,103  |
| AML | 63 M | 2 <sup>nd</sup> refractory relapse, initial CR < 6 mo.                             | WT     | PD | NA      |
| AML | 56 M | Refractory NOS, hx RCC                                                             | WT     | PD | 73,917  |
| AML | 29 M | 3 <sup>rd</sup> relapse, preceding response < 6 mo.                                | WT     | PD | 113,885 |
| AML | 66 M | 2 <sup>nd</sup> relapse, preceding response $\geq$ 6 mo.                           | WT     | PD | 367,648 |
| AML | 72 M | Relapse 1 <sup>st</sup> , initial response $\geq$ 6 mo., hx MM                     | Mutant | PD | 76,426  |
| AML | 72 M | Refractory NOS                                                                     | WT     | PD | N/A     |
| AML | 68 M | 1 <sup>st</sup> relapse, initial response > 6 mo.                                  | WT     | PD | NA      |

AML, acute myelogenous leukemia; ALL, acute lymphocytic leukemia; WT, wild type; CR, complete response; CRp, complete response without platelet recovery; PD, progressive disease; SD, stable disease; NA, not available; AUC<sub>ss</sub>, area under curve at steady state; DLBCL, diffuse large B-cell lymphoma; CA, cancer; RCC, renal cell carcinoma; MM, multiple myeloma; Hx, history; MDS, myelodysplastic syndrome; NOS, refractory anemia; MUD, matched unrelated donor; BMT, bone marrow transplant



| <b>Supplementary Data 4. Demographic Data by Cohort</b> |                     |                     |                |
|---------------------------------------------------------|---------------------|---------------------|----------------|
|                                                         | Stratum A<br>n = 96 | Stratum B<br>n = 20 | All<br>N = 116 |
| Sex, n (%)                                              |                     |                     |                |
| Male                                                    | 52 (54%)            | 14 (70%)            | 66 (57%)       |
| Female                                                  | 44 (46%)            | 6 (30%)             | 50 (43%)       |
| Age, years                                              |                     |                     |                |
| Median                                                  | 60                  | 66                  | 62             |
| Range                                                   | 19-85               | 54-79               | 19-85          |
| Race, n (%)                                             |                     |                     |                |
| Caucasian                                               | 79 (82%)            | 18 (90%)            | 97 (84%)       |
| Weight, kg                                              |                     |                     |                |
| Mean                                                    | 71                  | 78                  | 72             |
| SD                                                      | 15                  | 17                  | 15             |
| Previous regimens                                       |                     |                     |                |
| Mean                                                    | 3.4                 | 4.7                 | 3.6            |
| SD                                                      | 2.0                 | 2.9                 | 2.2            |

| <b>Supplementary Data 5. Adverse events &gt; 10% per Stratum</b> |                     |                       |                       |
|------------------------------------------------------------------|---------------------|-----------------------|-----------------------|
| <b>Stratum A</b>                                                 | <b>Total, n (%)</b> | <b>Grade 3, n (%)</b> | <b>Grade 4, n (%)</b> |
| Nausea                                                           | 68 (71)             | 10 (10)               | 0                     |
| Diarrhea                                                         | 58 (60)             | 7 (7)                 | 0                     |
| Vomiting                                                         | 39 (41)             | 6 (6)                 | 0                     |
| Febrile neutropenia                                              | 29 (30)             | 22 (23)               | 2 (2)                 |
| Fatigue                                                          | 28 (29)             | 5 (5)                 | 0                     |
| Abdominal pain                                                   | 27 (28)             | 8 (8)                 | 1 (1)                 |
| Decreased appetite                                               | 27 (28)             | 2 (2)                 | 0                     |
| Hypokalemia                                                      | 25 (26)             | 11 (11)               | 3 (3)                 |
| Peripheral edema                                                 | 23 (24)             | 0                     | 0                     |
| Weight decreased                                                 | 18 (19)             | 0                     | 0                     |
| Pyrexia                                                          | 17 (18)             | 5 (5)                 | 0                     |
| Headache                                                         | 15 (16)             | 1 (1)                 | 0                     |
| Hypomagnesemia                                                   | 15 (16)             | 2 (2)                 | 0                     |
| Pneumonia                                                        | 15 (16)             | 10 (10)               | 1 (1)                 |
| Epitaxis                                                         | 14 (15)             | 2 (2)                 | 0                     |
| Hypocalcemia                                                     | 13 (14)             | 5 (5)                 | 0                     |
| Oropharyngeal pain                                               | 13 (14)             | 0                     | 0                     |
| Asthenia                                                         | 12 (13)             | 0                     | 0                     |
| Cough                                                            | 12 (13)             | 0                     | 0                     |
| Dypnea                                                           | 12 (13)             | 0                     | 0                     |
| Hypertension                                                     | 12 (13)             | 3 (3)                 | 0                     |
| Insomnia                                                         | 12 (13)             | 0                     | 0                     |
| Constipation                                                     | 11 (11)             | 1 (1)                 | 0                     |
| Hypophosphatemia                                                 | 11 (11)             | 4 (4)                 | 1 (1)                 |
| Hypotension                                                      | 11 (11)             | 3 (3)                 | 0                     |
| <b>Stratum B</b>                                                 | <b>Total, n (%)</b> | <b>Grade 3, n (%)</b> | <b>Grade 4, n (%)</b> |
| Nausea                                                           | 11 (55)             | 1 (5)                 | 0                     |
| Diarrhea                                                         | 7 (35)              | 1 (5)                 | 0                     |
| Anemia                                                           | 6 (30)              | 2 (10)                | 1 (5)                 |
| Fatigue                                                          | 6 (30)              | 0                     | 0                     |
| Thrombocytopenia                                                 | 6 (30)              | 2 (10)                | 2 (10)                |
| Headache                                                         | 5 (25)              | 0                     | 0                     |
| Pneumonia                                                        | 5 (25)              | 4 (20)                | 1 (5)                 |
| Abdominal pain                                                   | 4 (20)              | 2 (10)                | 0                     |
| Arthralgia                                                       | 4 (20)              | 0                     | 0                     |
| Cough                                                            | 4 (20)              | 0                     | 0                     |
| Hyperuricemia                                                    | 3 (15)              | 0                     | 0                     |
| Hypotension                                                      | 3 (15)              | 2 (10)                | 0                     |
| Vomiting                                                         | 3 (15)              | 0                     | 0                     |

**Supplementary Data 6.** Day 10 dose-mean PK profiles in patients with leukemia.

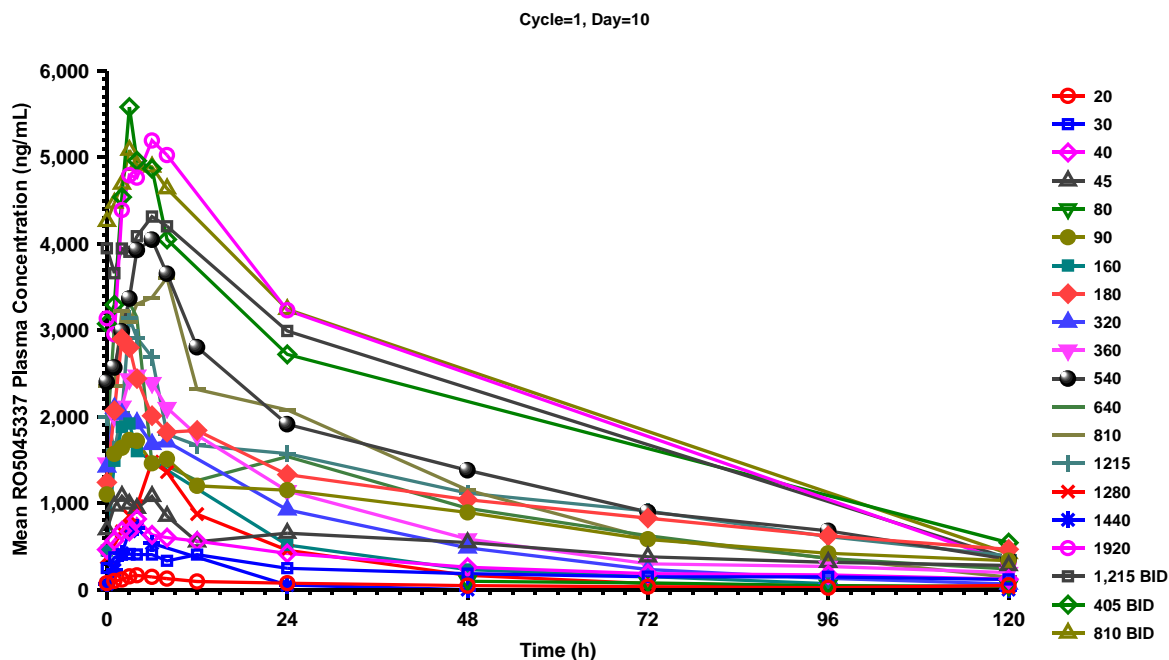

The mean plasma concentration of RG7112 ( $\text{mg}/\text{m}^2$ ) decreased over time (h) for Stratum A and Stratum B leukemia patients of Cycle 1, Day 10. The doses ranged from 20  $\text{mg}/\text{m}^2$  to 1820  $\text{mg}/\text{m}^2$  QD and 406  $\text{mg}/\text{m}^2$  to 1216  $\text{mg}/\text{m}^2$  BID. Each dose is represented as a different color in the plot. QD = once-daily; BID = twice-daily; h = hours.

**Supplementary Data 7. Pharmacokinetic parameters**

**CYCLE 1 Day 10**

| Stratum | Dose and Regimen                       | Formulation | AUC <sub>ss</sub> <sup>c</sup> | AUC <sub>0-12</sub> <sup>c</sup> | AUC <sub>0-24</sub> <sup>c</sup> | CMax <sup>c</sup>    | HLife <sup>c</sup> | TMax <sup>d</sup> |
|---------|----------------------------------------|-------------|--------------------------------|----------------------------------|----------------------------------|----------------------|--------------------|-------------------|
| A       | 20 mg/m <sup>2</sup> QD <sup>a</sup>   | Crystalline | 1597.2 (n=4)                   | 1006.6 (56.5%), n=4              | 1597.2 (64.4%), n=4              | 112.3 (48.3%), n=4   | 58.4 (114.9%), n=4 | 2.5 (2-4), n=4    |
| A       | 30 mg/m <sup>2</sup> QD                | Crystalline | 7859.2 (n=3)                   | 4300.9 (81.4%), n=3              | 7859.2 (88.4%), n=3              | 442.7 (67.4%), n=3   | 61.9 (40.8%), n=3  | 3.1 (3-4), n=3    |
| A       | 45 mg/m <sup>2</sup> QD                | Crystalline | 18842.6 (n=3)                  | 10260.8 (52.7%), n=3             | 18842.6 (54.9%), n=3             | 1080.0 (53.1%), n=3  | 96.2 (45.4%), n=3  | 2.0 (2-2), n=3    |
| A       | 90 mg/m <sup>2</sup> QD                | Crystalline | 31471 (n=1)                    | 17370 (-%), n=1                  | 31471 (-%), n=1                  | 1730 (-%), n=1       | 52 (-%), n=1       | 3 (3-3), n=1      |
| A       | 180 mg/m <sup>2</sup> QD               | Crystalline | 43824 (n=1)                    | 24682 (-%), n=1                  | 43824 (-%), n=1                  | 2900 (-%), n=1       | 57 (-%), n=1       | 2 (2-2), n=1      |
| A       | 360 mg/m <sup>2</sup> QD               | Crystalline | 49082.4 (n=2)                  | 27949.6 (82.0%), n=2             | 49082.4 (84.6%), n=2             | 3075.0 (78.0%), n=2  | 22.7 (34.1%), n=2  | 3.5 (1-6), n=2    |
| A       | 540 mg/m <sup>2</sup> QD               | Crystalline | 67635.3 (n=4)                  | 38648.8 (29.8%), n=4             | 67635.3 (25.0%), n=4             | 4227.5 (39.9%), n=4  | 36.3 (39.8%), n=4  | 4.7 (4-6), n=4    |
| A       | 810 mg/m <sup>2</sup> QD               | Crystalline | 67189.8 (n=5)                  | 36991.6 (58.5%), n=5             | 67189.8 (60.5%), n=5             | 4074.0 (59.5%), n=5  | 23.7 (46.0%), n=5  | 4.0 (3-8), n=5    |
| A       | 1215 mg/m <sup>2</sup> QD              | Crystalline | 48023.1 (n=4)                  | 27497.2 (83.4%), n=4             | 48023.1 (83.6%), n=4             | 3393.0 (93.0%), n=4  | 41.0 (43.0%), n=4  | 4.1 (3-6), n=4    |
| A       | 405 mg/m <sup>2</sup> BID <sup>b</sup> | Crystalline | 47889.4 (n=3)                  | 23944.7 (115.2%), n=3            | 46137.4 (112.4%), n=3            | 2518.7 (107.5%), n=3 | 55.0 (21.7%), n=2  | 3.0 (1-119), n=3  |
| A       | 810 mg/m <sup>2</sup> BID              | Crystalline | 108329.3 (n=7)                 | 54164.6 (49.8%), n=7             | 100944.3 (49.6%), n=7            | 5544.3 (52.8%), n=7  | 36.0 (57.1%), n=7  | 3.0 (1-6), n=7    |
| A       | 1215 mg/m <sup>2</sup> BID             | Crystalline | 93360.8 (n=3)                  | 46680.4 (81.3%), n=3             | 88065.4 (81.8%), n=3             | 4611.7 (80.7%), n=3  | 31.7 (40.0%), n=3  | 4.0 (2-8), n=3    |
|         | 1000 mg BID                            | Amorphous   | 129711.8 (n=5)                 | 64855.9 (31.5%), n=5             | 125264.1 (32.7%), n=5            | 6500.0 (30.1%), n=5  | 38.8 (30.8%), n=5  | 4.0 (2-8), n=5    |
| A       | 1500 mg BID                            | Amorphous   | 152244.4 (n=5)                 | 76122.2 (50.2%), n=5             | 137410.3 (52.9%), n=5            | 7726.0 (50.1%), n=5  | 21.8 (34.4%), n=5  | 3.0 (1-6), n=5    |
| A       | 1500 mg BID fed                        | Amorphous   | 220911.5 (n=6)                 | 110455.7 (50.3%), n=6            | 211081.2 (51.5%), n=6            | 10665.0 (51.6%), n=6 | 39.9 (42.2%), n=5  | 4.1 (1-6), n=6    |
| B       | 20 mg/m <sup>2</sup> QD                | Crystalline | 2752.4 (n=2)                   | 1702.9 (78.1%), n=2              | 2752.4 (77.8%), n=2              | 203.2 (76.5%), n=2   | 31.8 (37.9%), n=2  | 3.5 (3-4), n=2    |
| B       | 40 mg/m <sup>2</sup> QD                | Crystalline | 6397.3 (n=2)                   | 3634.4 (50.0%), n=2              | 6397.3 (25.0%), n=2              | 448.0 (10.4%), n=2   | 32.2 (34.1%), n=2  | 3.5 (3-4), n=2    |
| B       | 160 mg/m <sup>2</sup> QD               | Crystalline | 27242 (n=1)                    | 17062 (-%), n=1                  | 27242 (-%), n=1                  | 1920 (-%), n=1       | 25 (-%), n=1       | 3 (3-3), n=1      |
| B       | 320 mg/m <sup>2</sup> QD               | Crystalline | 37011 (n=1)                    | 20582 (-%), n=1                  | 37011 (-%), n=1                  | 2100 (-%), n=1       | 25 (-%), n=1       | 1 (1-1), n=1      |
| B       | 1920 mg/m <sup>2</sup> QD              | Crystalline | 81804.9 (n=3)                  | 42236.8 (102.2%), n=3            | 81804.9 (111.8%), n=3            | 4514.3 (92.9%), n=3  | 20.8 (72.1%), n=3  | 4.1 (3-8), n=3    |
| B       | 1920 mg/m <sup>2</sup> QD              | Crystalline | 89972.3 (n=3)                  | 49820.6 (27.6%), n=3             | 89972.3 (28.9%), n=3             | 5646.7 (31.6%), n=3  | 17.2 (18.9%), n=3  | 2.3 (2-6), n=3    |

|   |                   |           |                 |                       |                        |                      |                    |                  |
|---|-------------------|-----------|-----------------|-----------------------|------------------------|----------------------|--------------------|------------------|
| A | TAIL 1500 mg BID  | Amorphous | 167325.1 (n=19) | 83662.5 (48.0%), n=19 | 162685.4 (47.0%), n=19 | 8719.5 (45.9%), n=19 | 47.1 (53.7%), n=17 | 3.3 (0-25), n=19 |
| A | MTD (1500 mg BID) | Amorphous | 175528.9 (n=30) | 87764.5 (49.4%), n=30 | 168152.0 (49.6%), n=30 | 8943.0 (47.6%), n=30 | 41.1 (56.6%), n=27 | 3.6 (0-25), n=30 |

AUC<sub>ss</sub>, area under curve at steady state; MTD, maximum tolerated dose; QD, once-daily; BID, twice-daily; C<sub>max</sub>, maximum observed plasma concentration; H<sub>life</sub>, half-life; T<sub>max</sub>, time to reach maximum concentration

<sup>a</sup> AUC at Steady State for QD patients = AUC 0-24 hr at Cycle 1 Day 10

<sup>b</sup> AUC at Steady State for BID patients = 2 \* (AUC 0-12 hr at Cycle 1 Day 10)

<sup>c</sup> Format of Assessment Visit Statistics for PK parameters other than TMax: Mean (CV%), n =

<sup>d</sup> Format of Assessment Visit Statistics for TMax: Median (Minimum – Maximum), n =

| <b>Supplementary Data 8. Summary of steady state AUC for AML patients treated at the MTD</b> |                          |           |
|----------------------------------------------------------------------------------------------|--------------------------|-----------|
|                                                                                              | <b>Clinical Activity</b> | <b>PD</b> |
| N                                                                                            | 14                       | 11        |
| Mean                                                                                         | 224307                   | 134040    |
| Median                                                                                       | 221691                   | 113845    |
| Std. Dev.                                                                                    | 70093                    | 88069     |
| Std. Err.                                                                                    | 18733                    | 26554     |
| Minimum                                                                                      | 1077872                  | 58796     |
| Maximum                                                                                      | 365078                   | 367648    |
| CV (%)                                                                                       | 31                       | 66        |

Clinical Activity, CR (complete response), CRp (complete response without platelet recovery), PR (partial response) or SD (stable disease); PD, progressive disease; AUC, area under curve; AML, acute myelogenous leukemia; MTD, maximum tolerated dose; CV, coefficient of variation

**Supplementary Data 9. Clinical activity for patients with p53 mutations**

| Portion of Study                                            | Patient (Stratum)     | Call    | Codon       | Codon Change | Exon     | Mutant Type | Protein Description       | p53 Function                                      | Best Response   |
|-------------------------------------------------------------|-----------------------|---------|-------------|--------------|----------|-------------|---------------------------|---------------------------------------------------|-----------------|
| Dose Escalation - Blood Only                                | 9701 (B)              | C to G  | 94_2        | TCA to TGA   | 4B       | Nonsense    | S94STOP                   | no information                                    |                 |
|                                                             | 8604 (A)              | G to A  | 141_2       |              | 5        | Missense    | C141Y                     | Non-functional(36)                                | PD              |
|                                                             |                       | C to G  | 196_1       |              | 6        | Missense    | R196G                     | Partially functional(36)                          |                 |
|                                                             | 8607 (A)              | A to G  |             |              | Intron 3 | Splice      |                           | No information                                    | SD              |
|                                                             | 9604 (B)              | 2bp del | 209_1-209_2 |              | 6        | Frameshift  |                           | No information                                    | PR              |
|                                                             | 9605 (B)              | A to G  |             |              | Intron 3 | Splice      |                           | No information                                    | SD              |
|                                                             | 9609 (B)              | G to T  | 249_2       | AGG to ATG   | 7        | Missense    | R249M                     | Possibly damaging(37, 38)                         | SD              |
|                                                             | 9610 (B)              | G to A  | 266_2       | GGA to GAA   | 8        | Missense    | G266E                     | Probably damaging(37, 38)                         | SD              |
|                                                             | 8806 (A)              | A to G  | 132_2       | AAG to AGG   | 5        | Missense    | K132R                     | Non-functional(36)                                |                 |
|                                                             | 5502 (A)              | C to T  | 282_1       | CGG to TGG   | 8        | Missense    | R282W                     | Non-functional(36)                                | PD              |
|                                                             | 9303 (B)              | A to G  | 179_2       | CAT to CGT   | 5        | Missense    | H179R                     | Probably damaging(37, 38)                         | PD              |
| A to G                                                      |                       | 239_1   | AAC to GAC  | 7            | Missense | N239D       | Probably damaging(37, 38) |                                                   |                 |
| Amorphous Escalation - Blood & Bone Marrow (when available) | 8325 (A) <sup>a</sup> | A to G  | 240_1       | AGT to GGT   | 7        | Missense    | S240G                     | Probably minor impact on DNA binding <sup>c</sup> | SD              |
|                                                             | 8421 (A)              | G to A  | 175_2       | CGC to CAG   | 5        | Missense    | R175H                     | Non-functional(36)                                | PD <sup>2</sup> |
|                                                             | 8821 (A)              | G to A  | 146_2       | TGG to TAG   | 5        | Nonsense    | W146STOP                  | No information                                    | PD              |
|                                                             | 5522 (A) <sup>a</sup> | DELG    | 323_3-324_1 |              | 9        | Frame-shift |                           | Probably impact on DNA binding <sup>c</sup>       | PD              |
| Tail - Blood and Bone Marrow (when available)               | 8626 (A)              | G to A  | 248_2       | CGG to CAG   | 7        | Missense    | R248Q                     | Significant impact on DNA binding(39)             | PD              |
|                                                             | 8630 (A)              | C to G  | 213_1       | CGA to GGA   | 6        | Missense    | R213G                     | Probably damaging(37, 38)                         | SD              |
|                                                             | 8635 (A)              | A to C  |             |              | Intron 7 | Splice      |                           | No information                                    | PD <sup>b</sup> |
|                                                             | 8726 (A)              | A to G  | 281_2       | GAC to GGC   | 8        | Missense    | D281G                     | Impact on DNA binding <sup>c</sup>                |                 |
|                                                             | 8329 (A)              | G to T  | 266_2       | GGA to GTA   | 8        | Missense    | G266V                     | Non-functional(36)                                |                 |

SD, stable disease; PD, progressive disease; PR, partial response

<sup>a</sup> Blood and bone marrow were discordant. Mutation detected in bone marrow but blood was wild type

<sup>b</sup> Patients showed evidence of clinical activity (decreased peripheral blast counts)

<sup>c</sup> Predictions were performed by Roche based on the structure of p53(39)

**Supplementary Data 10.** RG7112 induces p53-mediated apoptosis in circulating lymphoma cells from a patient with SLL/CLL (810 mg to 1500 mg BID).

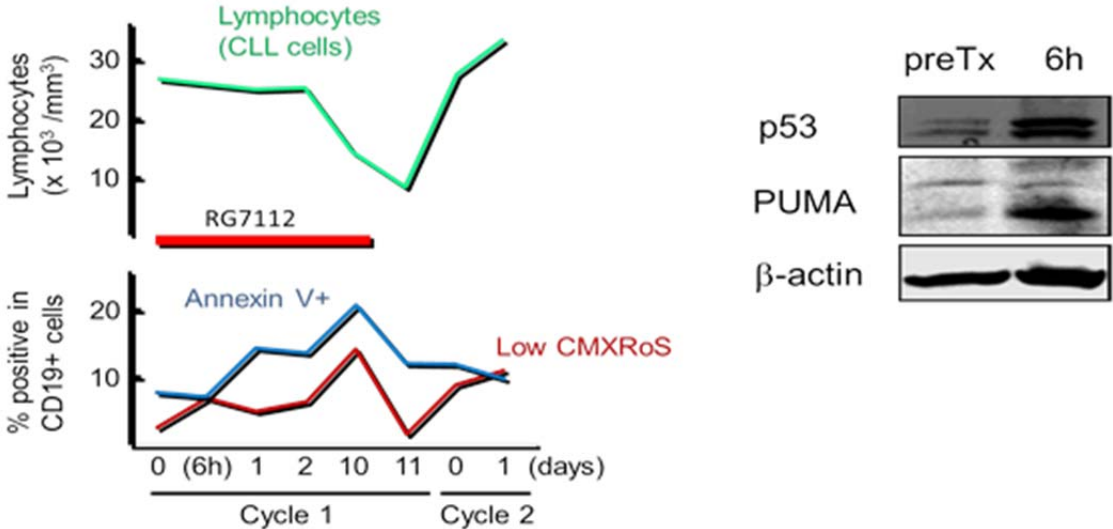

Supplement: NIHMS769666-supplement-Supplemental_Data.pdf [file NIHMS769666-supplement-Supplemental_Data.pdf]
